# Supplementary material for: Novel prophylactic and therapeutic multi-epitope vaccine based on Ag85A, Ag85B, ESAT-6, and CFP-10 of Mycobacterium tuberculosis using an immunoinformatics approach
Source: PubMed Central journal article supplement — Osong Public Health Res Perspect. 2024 Jul 26;15(4):286–306. doi: 10.24171/j.phrp.2024.0026 (PMC11391370; doi:10.24171/j.phrp.2024.0026), 2024-07-26
Supplement: j-phrp-2024-0026-Supplementary-figure-2.pdf [file j-phrp-2024-0026-Supplementary-figure-2.pdf]

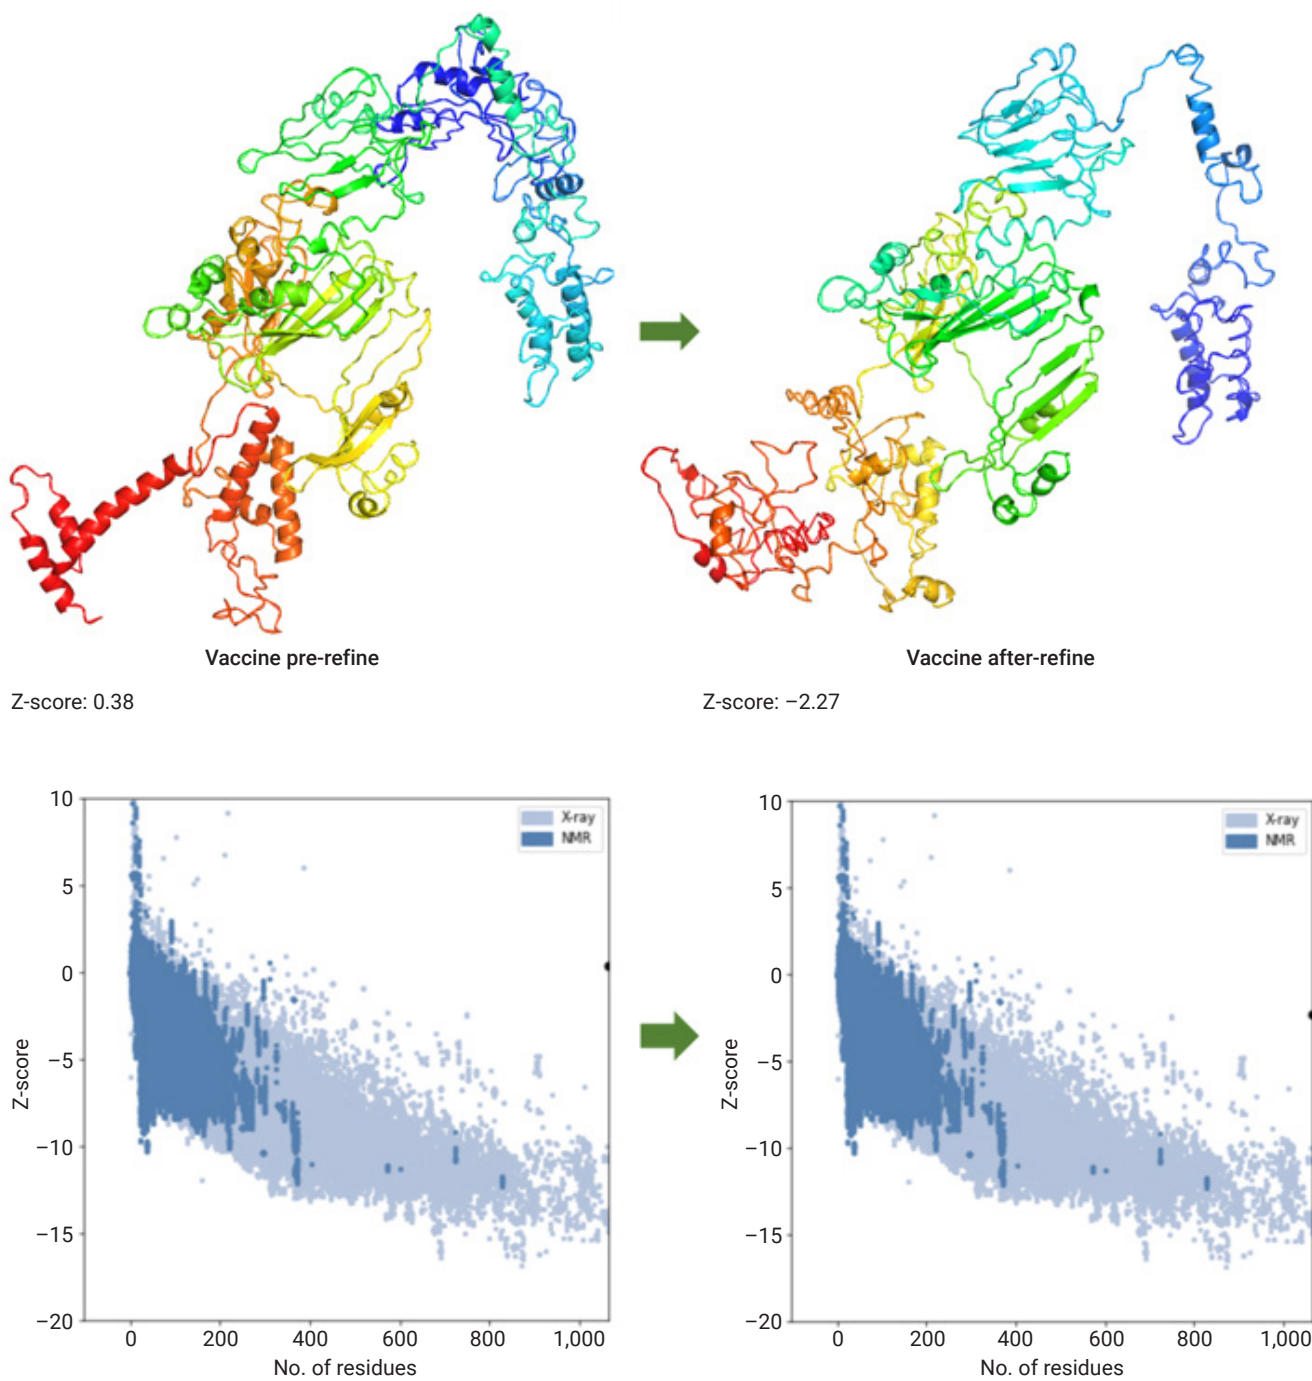

**Figure S2.** Visualization and Z-score of multi-epitope vaccine constructed before and after refine. NMR, nuclear magnetic resonance.
