# Supplementary material for: Novel prophylactic and therapeutic multi-epitope vaccine based on Ag85A, Ag85B, ESAT-6, and CFP-10 of Mycobacterium tuberculosis using an immunoinformatics approach
Source: PubMed Central journal article supplement — Osong Public Health Res Perspect. 2024 Jul 26;15(4):286–306. doi: 10.24171/j.phrp.2024.0026 (PMC11391370; doi:10.24171/j.phrp.2024.0026), 2024-07-26
Supplement: j-phrp-2024-0026-Supplementary-Table-1.pdf [file j-phrp-2024-0026-Supplementary-Table-1.pdf]

**Table S1.** Results of the epitope prediction of the CTL proteins Ag85A, Ag85B, ESAT-6, and CFP-10

| Protein   | Peptide   | Length      | Allel       | Percentile | Immunogenicity | Antigenicity          | Allergenicity         |                       | Toxicity  |
|-----------|-----------|-------------|-------------|------------|----------------|-----------------------|-----------------------|-----------------------|-----------|
|           |           |             |             |            |                |                       | AllergenFP V.1.0      | Allertop V.2.0        |           |
| Ag85A     | GLPVEYLQV | 48–56       | HLA-A*02:01 | 0.26       | 0.05492        | 0.7069                | Probable non-allergen | Probable non-allergen | Non-toxin |
|           |           |             | HLA-A*02:06 | 0.42       |                |                       |                       |                       |           |
|           | RPGLPVEYL | 46–54       | HLA-B*07:02 | 0.06       | 0.11024        | 0.5177                | Probable non-allergen | Probable non-allergen | Non-toxin |
|           |           |             | HLA-C*04:01 | 0.82       |                |                       |                       |                       |           |
| Ag85B     | GLAGGAATA | 30–38       | HLA-A*02:01 | 0.52       | 0.17233        | 0.6797                | Probable non-allergen | Probable non-allergen | Non-toxin |
|           |           |             | HLA-A*02:06 | 0.93       |                |                       |                       |                       |           |
|           | AATAGAFSR | 35–43       | HLA-A*33:03 | 0.54       | 0.12394        | 0.8304                | Probable non-allergen | Probable non-allergen | Non-toxin |
|           |           |             | HLA-A*31:01 | 0.57       |                |                       |                       |                       |           |
| GPSLIGLAM |           | 200–208     | HLA-A*11:01 | 0.86       |                |                       |                       |                       |           |
|           |           |             | HLA-B*14:02 | 1.5        | 0.11014        | 0.6079                | Probable non-allergen | Probable non-allergen | Non-toxin |
|           |           |             | HLA-C*04:01 | 1.5        |                |                       |                       |                       |           |
|           |           |             | HLA-B*18:01 | 2          |                |                       |                       |                       |           |
| NAAGGHNAV |           | 285–293     | HLA-B*07:02 | 0.04       |                |                       |                       |                       |           |
|           |           |             | HLA-B*14:02 | 0.67       | 0.12765        | 1.9957                | Probable non-allergen | Probable non-allergen | Non-toxin |
|           |           |             | HLA-C*04:01 | 1.6        |                |                       |                       |                       |           |
|           |           |             | HLA-B*07:02 | 1.7        |                |                       |                       |                       |           |
| AAGGHNAV  |           | 286–294     | HLA-A*26:01 | 1.8        |                |                       |                       |                       |           |
|           |           |             | HLA-A*68:02 | 0.2        |                |                       |                       |                       |           |
|           |           |             | HLA-B*07:02 | 1.9        | 0.12765        | 1.1841                | Probable non-allergen | Probable non-allergen | Non-toxin |
|           |           |             | HLA-A*29:02 | 1.9        | 0.10755        | 1.2027                | Probable non-allergen | Probable non-allergen | Non-toxin |
| ESAT-6    | GSAALGLSM | 159–167     | HLA-A*02:01 | 1.9        | 0.0031         | 1.2822                | Probable non-allergen | Probable non-allergen | Non-toxin |
|           | AMASTEKNV | 82–90       | HLA-A*02:01 | 1.9        | 0.03003        | 0.7677                | Probable non-allergen | Probable non-allergen | Non-toxin |
| CFP-10    | TAAQAQAVR | 49–57       | HLA-A*33:03 | 0.37       |                |                       |                       |                       |           |
|           |           |             | HLA-A*31:01 |            |                |                       |                       |                       |           |
|           | EMKTAATL  | 3–11        | HLA-A*26:01 | 2          | 0.08319        | 1.2820                | Probable non-allergen | Probable non-allergen | Non-toxin |
|           |           |             | HLA-B*14:02 | 0.77       | 0.08319        |                       |                       |                       |           |
| DEISTNIRQ | 70–78     | HLA-B*18:01 | 0.37        | 0.051      | 1.0657         | Probable non-allergen | Probable non-allergen | Non-toxin             |           |

CTL, cytotoxic T lymphocyte.
