# Supplementary material for: Novel prophylactic and therapeutic multi-epitope vaccine based on Ag85A, Ag85B, ESAT-6, and CFP-10 of Mycobacterium tuberculosis using an immunoinformatics approach
Source: PubMed Central journal article supplement — Osong Public Health Res Perspect. 2024 Jul 26;15(4):286–306. doi: 10.24171/j.phrp.2024.0026 (PMC11391370; doi:10.24171/j.phrp.2024.0026), 2024-07-26
Supplement: j-phrp-2024-0026-Supplementary-Table-2.pdf [file j-phrp-2024-0026-Supplementary-Table-2.pdf]

**Table S2.** Results of the epitope prediction of the HTL proteins Ag85A, Ag85B and CFP-10

| Protein | Peptide         | Length  | Allele                                          | Percentile  | Immunogenicity | Allergenicity         |                       | Toxicity  | IL-4             | IL-10             | IFN-γ   |
|---------|-----------------|---------|-------------------------------------------------|-------------|----------------|-----------------------|-----------------------|-----------|------------------|-------------------|---------|
|         |                 |         |                                                 |             |                | Allergen FP v.1.0     | AllerTOPv.2.0         |           |                  |                   |         |
| Ag85A   | SGLVGAVGGTATAGA | 29–43   | HLA-DQA1*05:01/<br>DQB1*03:01                   | 0.21        | 1.2452         | Probable non-allergen | Probable non-allergen | Non-toxin | Non-IL-4 inducer | Non-IL-10 inducer | Positif |
|         | AVVGLSMAASSALTL | 164–178 | HLA-DRB1*09:01                                  | 0.27        | 0.7053         | Probable non-allergen | Probable non-allergen | Non-toxin | Non-IL-4 inducer | Non-IL-10 inducer | Positif |
|         | GLVGAVGGTATAGAF | 30–44   | HLA-DQA1*05:01/<br>DQB1*03:01                   | 0.27        | 0.8397         | Probable non-allergen | Probable non-allergen | Non-toxin | Non-IL-4 inducer | Non-IL-10 inducer | Positif |
|         | LVGAVGGTATAGAFS | 31–45   | HLA-DQA1*05:01/<br>DQB1*03:01                   | 0.32        | 0.8053         | Probable non-allergen | Probable non-allergen | Non-toxin | Non-IL-4 inducer | Non-IL-10 inducer | Positif |
|         | GSVVGLSMAASSAL  | 162–176 | HLA-DRB1*09:01<br>HLA-DQA1*01:02/<br>DQB1*06:02 | 0.34<br>1.3 | 0.7072         | Probable non-allergen | Probable non-allergen | Non-toxin | Non-IL-4 inducer | Non-IL-10 inducer | Positif |
|         | SAVVGLSMAASSALT | 163–177 | HLA-DRB1*09:01<br>HLA-DQA1*01:02/<br>DQB1*06:02 | 0.34<br>1.5 | 0.6602         | Probable non-allergen | Probable non-allergen | Non-toxin | Non-IL-4 inducer | Non-IL-10 inducer | Positif |
|         | LPVEYLQVPSMGR   | 49–63   | HLA-DRB1*04:01                                  | 0.38        | 0.7922         | Probable non-allergen | Probable non-allergen | Non-toxin | Non-IL-4 inducer | Non-IL-10 inducer | Positif |
|         | VGAVGGTATAGAFSR | 32–46   | HLA-DQA1*05:01/<br>DQB1*03:01                   | 0.56        | 0.8616         | Probable non-allergen | Probable non-allergen | Non-toxin | IL-4 inducer     | Non-IL-10 inducer | Positif |
|         | VEYLQVPSMGRDI   | 51–65   | HLA-DRB1*04:01                                  | 0.7         | 0.7257         | Probable non-allergen | Probable non-allergen | Non-toxin | Non-IL-4 inducer | Non-IL-10 inducer | Positif |
|         | GLPVEYLQVPSMSG  | 48–62   | HLA-DRB1*04:01                                  | 0.77        | 0.7985         | Probable non-allergen | Probable non-allergen | Non-toxin | Non-IL-4 inducer | Non-IL-10 inducer | Positif |
|         | GAVGGTATAGAFSRP | 33–47   | HLA-DQA1*05:01/<br>DQB1*03:01                   | 0.93        | 0.8415         | Probable non-allergen | Probable non-allergen | Non-toxin | Non-IL-4 inducer | Non-IL-10 inducer | Positif |
|         | TGSAAVGLSMAASSA | 161–175 | HLA-DQA1*01:02/<br>DQB1*06:02                   | 1.3         | 0.9493         | Probable non-allergen | Probable non-allergen | Non-toxin | Non-IL-4 inducer | Non-IL-10 inducer | Positif |
|         | PTGSAAVGLSMAASS | 160–174 | HLA-DQA1*01:02/<br>DQB1*06:02                   | 1.5         | 0.7231         | Probable non-allergen | Probable non-allergen | Non-toxin | Non-IL-4 inducer | Non-IL-10 inducer | Positif |
|         | PVEYLQVPSMGRD   | 50–64   | HLA-DRB1*04:01                                  | 0.46        | 0.7094         | Probable non-allergen | Probable non-allergen | Non-toxin | Non-IL-4 inducer | Non-IL-10 inducer | Positif |
|         | MIGTAAAVVLPGLVG | 16–30   | HLA-DQA1*01:02/<br>DQB1*06:02                   | 0.89        | 0.6167         | Probable non-allergen | Probable non-allergen | Non-toxin | Non-IL-4 inducer | IL-10 inducer     | Positif |

(Continued to the next page)

**Table S2.** Continued

| Protein         | Peptide         | Length  | Allele          | Percentile | Immunogenicity | Allergenicity         |                       | Toxicity  | IL-4             | IL-10             | IFN-γ   |
|-----------------|-----------------|---------|-----------------|------------|----------------|-----------------------|-----------------------|-----------|------------------|-------------------|---------|
|                 |                 |         |                 |            |                | Allergen FP v.1.0     | AllerTOPv.2.0         |           |                  |                   |         |
| Ag85B           | LENFVRSSNLKFDQA | 269–283 | HLA-DRB1*13:02  | 0.97       | 0.6656         | Probable non-allergen | Probable non-allergen | Non-toxin | IL-4 inducer     | IL-10 non-inducer | Positif |
|                 |                 |         | HLA-DRB3*02:02  | 1.3        |                |                       |                       |           |                  |                   |         |
| ENFVRSSNLKFDAY  | 270–284         |         | HLA-DRB1*04:01  | 1.7        | 0.6533         | Probable non-allergen | Probable non-allergen | Non-toxin | IL-4 inducer     | IL-10 non-inducer | Negatif |
|                 |                 |         | HLA-DRB1*13:02  | 1.4        |                |                       |                       |           |                  |                   |         |
|                 |                 |         | HLA-DRB3*02:02  | 1.8        |                |                       |                       |           |                  |                   |         |
|                 |                 |         | HLA-DRB1*04:01  | 2          |                |                       |                       |           |                  |                   |         |
| IGTAAAVVLPGLVGL | 17–31           |         | HLA-DQA1*01:02/ | 1.7        | 0.8207         | Probable non-allergen | Probable non-allergen | Non-toxin | Non-IL-4 inducer | IL-10 inducer     | Negatif |
|                 |                 |         | DQB1*06:02      |            |                |                       |                       |           |                  |                   |         |
| PTGSAAGLSMAGSS  | 157–171         |         | HLA-DQA1*05:01/ | 1.8        | 0.6078         | Probable non-allergen | Probable non-allergen | Non-toxin | Non-IL-4 inducer | IL-10 non-inducer | Positif |
|                 |                 |         | DQB1*03:01      |            |                |                       |                       |           |                  |                   |         |
| TGSAAIGLSMAGSSA | 158–172         |         | HLA-DQA1*05:01/ | 1.8        | 0.7204         | Probable non-allergen | Probable non-allergen | Non-toxin | Non-IL-4 inducer | IL-10 non-inducer | Positif |
|                 |                 |         | DQB1*03:01      |            |                |                       |                       |           |                  |                   |         |
| GSAAGLSMAGSSAM  | 159–173         |         | HLA-DQA1*05:01/ | 2          | 0.6869         | Probable non-allergen | Probable non-allergen | Non-toxin | Non-IL-4 inducer | IL-10 non-inducer | Positif |
|                 |                 |         | DQB1*03:01      |            |                |                       |                       |           |                  |                   |         |
| CFP-10          | RGAAGTAAQAAVRF  | 44–58   | HLA-DQA1*01:02/ | 0.03       | 1.2701         | Probable non-allergen | Probable non-allergen | Non-toxin | IL-4 inducer     | IL-10 non-inducer | Negatif |
|                 |                 |         | DQB1*06:02      |            |                |                       |                       |           |                  |                   |         |
| AAVRFQEAANKQKQ  | 53–67           |         | HLA-DRB5*01:01  | 0.79       | 0.6776         | Probable non-allergen | Probable non-allergen | Non-toxin | IL-4 inducer     | IL-10 inducer     | Positif |
|                 |                 |         | HLA-DRB5*01:01  |            |                |                       |                       |           |                  |                   |         |
| VRFQEAANKQKQKLD | 56–70           |         | HLA-DRB5*01:01  | 1.1        | 1.2201         | Probable non-allergen | Probable non-allergen | Non-toxin | IL-4 inducer     | IL-10 inducer     | Negatif |
|                 |                 |         | HLA-DRB5*01:01  |            |                |                       |                       |           |                  |                   |         |
| LQGQWRGAAGTAAQA | 39–53           |         | HLA-DQA1*05:01/ | 1.5        | 0.8285         | Probable non-allergen | Probable non-allergen | Non-toxin | IL-4 inducer     | IL-10 non-inducer | Negatif |
|                 |                 |         | DQB1*03:01      |            |                |                       |                       |           |                  |                   |         |

HTL, helper T lymphocyte; IL, interleukin; IFN, interferon.
