# Supplementary material for: Novel prophylactic and therapeutic multi-epitope vaccine based on Ag85A, Ag85B, ESAT-6, and CFP-10 of Mycobacterium tuberculosis using an immunoinformatics approach
Source: PubMed Central journal article supplement — Osong Public Health Res Perspect. 2024 Jul 26;15(4):286–306. doi: 10.24171/j.phrp.2024.0026 (PMC11391370; doi:10.24171/j.phrp.2024.0026), 2024-07-26
Supplement: j-phrp-2024-0026-Supplementary-Table-3.pdf [file j-phrp-2024-0026-Supplementary-Table-3.pdf]

**Table S3.** Results of the epitope prediction of the LBL proteins Ag85A, Ag85B, ESAT-6, and CFP-10

| Protein | Peptida           | Posisi Awal | Skor | Antigen | Allergen              | Toksin    | Prediksi epitope |
|---------|-------------------|-------------|------|---------|-----------------------|-----------|------------------|
| Ag85A   | AGGYKASDMWGPKEPD  | 214         | 0.84 | 0.6276  | Probable non-allergen | Non-toxin | Non-epitope      |
|         | QDAYNAGGGHNGVDF   | 284         | 0.73 | 1.4341  | Probable non-allergen | Non-toxin | Non-epitope      |
|         | GAALVSGLVGAVGGTA  | 24          | 0.71 | 0.6506  | Probable non-allergen | Non-toxin | Non-epitope      |
|         | PAFEWYDQSGLSVMP   | 99          | 0.69 | 0.7322  | Probable non-allergen | Non-toxin | Ige epitope      |
|         | KVQFQSGGANSPALYL  | 66          | 0.66 | 1.2757  | Probable non-allergen | Non-toxin | Non-epitope      |
|         | SAVVGLSMAASSALTL  | 163         | 0.64 | 0.713   | Probable non-allergen | Non-toxin | Non-epitope      |
|         | DFSGWDINTPAFEWYD  | 90          | 0.90 | 1.1686  | Probable non-allergen | Non-toxin | Non-epitope      |
|         | AGGYKAADMWGPSSDP  | 211         | 0.88 | 0.5639  | Probable non-allergen | Non-toxin | Non-epitope      |
|         | LRAQDDYNGWDINTPA  | 82          | 0.85 | 1.195   | Probable non-allergen | Non-toxin | Non-epitope      |
|         | HSWEYWGAQLNAMKGD  | 302         | 0.83 | 0.6579  | Probable non-allergen | Non-toxin | Non-epitope      |
| Ag85B   | LQVSPSMGRDIKIQF   | 51          | 0.79 | 1.6541  | Probable non-allergen | Non-toxin | Non-epitope      |
|         | YCGNGTPNELGGANIP  | 250         | 0.79 | 1.1227  | Probable non-allergen | Non-toxin | Non-epitope      |
|         | GWDINTPAFEWYQSG   | 90          | 0.78 | 1.6587  | Probable non-allergen | Non-toxin | Non-epitope      |
|         | PAFEWYQSGLSIVMP   | 96          | 0.67 | 1.0464  | Probable non-allergen | Non-toxin | Non-epitope      |
|         | PTGSAAGLSMAGSSA   | 157         | 0.61 | 1.0428  | Probable non-allergen | Non-toxin | Non-epitope      |
|         | ANRAVKPTGSAAGLS   | 151         | 0.55 | 0.6205  | Probable non-allergen | Non-toxin | Non-epitope      |
|         | KWDATATELNNALQNL  | 57          | 0.89 | 0.5375  | Probable non-allergen | Non-toxin | Non-epitope      |
|         | AGSLQQWRGAAGTAA   | 36          | 0.78 | 0.7639  | Probable non-allergen | Non-toxin | Non-epitope      |
|         | VRFQEAANKQKQKLE   | 56          | 0.76 | 1.1164  | Probable non-allergen | Non-Toxin | Non-epitope      |
|         | EMKTDAAATLAQEAGNF | 3           | 0.64 | 0.5354  | Probable non-allergen | Non-toxin | Non-epitope      |
| ESAT-6  | YSRADEEQQALSSQM   | 83          | 0.55 | 0.9904  | Probable non-allergen | Non-toxin | Non-epitope      |
|         |                   |             |      |         |                       |           |                  |
| CFP-10  |                   |             |      |         |                       |           |                  |
|         |                   |             |      |         |                       |           |                  |

LBL, linear B lymphocyte.
