# Supplementary material for: Novel prophylactic and therapeutic multi-epitope vaccine based on Ag85A, Ag85B, ESAT-6, and CFP-10 of Mycobacterium tuberculosis using an immunoinformatics approach
Source: PubMed Central journal article supplement — Osong Public Health Res Perspect. 2024 Jul 26;15(4):286–306. doi: 10.24171/j.phrp.2024.0026 (PMC11391370; doi:10.24171/j.phrp.2024.0026), 2024-07-26
Supplement: j-phrp-2024-0026-Supplementary-Table-4.pdf [file j-phrp-2024-0026-Supplementary-Table-4.pdf]

**Table S4.** 3-Dimensional structure prediction of vaccine construct

| Model 1                                                                           | Model 2                                                                           | Model 3                                                                           | Model 4                                                                            | Model 5                                                                             |
|-----------------------------------------------------------------------------------|-----------------------------------------------------------------------------------|-----------------------------------------------------------------------------------|------------------------------------------------------------------------------------|-------------------------------------------------------------------------------------|
| 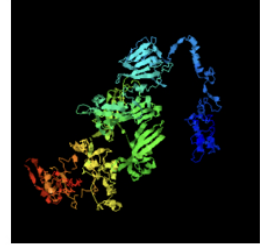 |  |  |  |  |
| C-score: -0.96                                                                    | C-score: -2.03                                                                    | C-score: -1.87                                                                    | C-score: -4.87                                                                     | C-score: -5                                                                         |
