# Supplementary material for: Novel prophylactic and therapeutic multi-epitope vaccine based on Ag85A, Ag85B, ESAT-6, and CFP-10 of Mycobacterium tuberculosis using an immunoinformatics approach
Source: PubMed Central journal article supplement — Osong Public Health Res Perspect. 2024 Jul 26;15(4):286–306. doi: 10.24171/j.phrp.2024.0026 (PMC11391370; doi:10.24171/j.phrp.2024.0026), 2024-07-26
Supplement: j-phrp-2024-0026-Supplementary-Table-5.pdf [file j-phrp-2024-0026-Supplementary-Table-5.pdf]

Table S5. Disulfide bond of the vaccine

| Residue 1 |       |     | Residue 2 |       |     | Bond     |          |                   |
|-----------|-------|-----|-----------|-------|-----|----------|----------|-------------------|
| Chain     | Seq # | AA  | Chain     | Seq # | AA  | $\chi^3$ | kcal/mol | $\Sigma B$ factor |
| A         | 7     | CYS | A         | 32    | LEU | +83.94   | 6.12     | 0.00              |
| A         | 11    | CYS | A         | 22    | ALA | -115.82  | 3.92     | 0.00              |
| A         | 13    | THR | A         | 18    | GLY | -59.28   | 6.49     | 0.00              |
| A         | 13    | THR | A         | 22    | ALA | +124.22  | 5.73     | 0.00              |
| A         | 15    | GLY | A         | 18    | GLY | -68.40   | 5.52     | 0.00              |
| A         | 29    | VAL | A         | 65    | GLY | +87.26   | 2.18     | 0.00              |
| A         | 37    | TYR | A         | 54    | PRO | +86.21   | 2.54     | 0.00              |
| A         | 39    | PRO | A         | 48    | ALA | +118.66  | 7.40     | 0.00              |
| A         | 41    | LEU | A         | 72    | ALA | -101.73  | 2.15     | 0.00              |
| A         | 42    | ILE | A         | 102   | THR | -105.96  | 5.74     | 0.00              |
| A         | 42    | ILE | A         | 103   | ASN | +125.95  | 7.55     | 0.00              |
| A         | 45    | ALA | A         | 145   | TYR | -92.15   | 4.04     | 0.00              |
| A         | 74    | ALA | A         | 79    | ASN | +110.12  | 3.21     | 0.00              |
| A         | 75    | ALA | A         | 78    | HIS | -96.46   | 2.82     | 0.00              |
| A         | 101   | SER | A         | 104   | ILE | +106.95  | 1.45     | 0.00              |
| A         | 105   | ARG | A         | 108   | ALA | -76.66   | 4.11     | 0.00              |
| A         | 146   | GLY | A         | 319   | SER | -60.29   | 3.86     | 0.00              |
| A         | 148   | ALA | A         | 319   | SER | -94.87   | 3.59     | 0.00              |
| A         | 157   | TYR | A         | 169   | TYR | +77.21   | 6.46     | 0.00              |
| A         | 161   | ALA | A         | 166   | ARG | +73.94   | 4.76     | 0.00              |
| A         | 162   | GLY | A         | 293   | GLY | -57.44   | 2.18     | 0.00              |
| A         | 171   | MET | A         | 296   | MET | -72.83   | 4.56     | 0.00              |
| A         | 183   | ALA | A         | 186   | ALA | +92.47   | 3.24     | 0.00              |
| A         | 187   | ALA | A         | 192   | ALA | +107.89  | 2.26     | 0.00              |
| A         | 188   | VAL | A         | 191   | ALA | +82.87   | 4.98     | 0.00              |
| A         | 190   | ARG | A         | 256   | THR | +115.87  | 4.78     | 0.00              |
| A         | 206   | PRO | A         | 212   | GLY | +117.43  | 5.90     | 0.00              |
| A         | 216   | GLY | A         | 220   | ALA | -113.43  | 2.66     | 0.00              |
| A         | 239   | ALA | A         | 245   | GLY | -84.72   | 2.18     | 0.00              |
| A         | 261   | ALA | A         | 266   | PRO | +121.85  | 3.41     | 0.00              |
| A         | 262   | PHE | A         | 265   | GLY | +96.58   | 2.73     | 0.00              |
| A         | 280   | ALA | A         | 298   | ALA | +118.23  | 4.30     | 0.00              |
| A         | 286   | PRO | A         | 289   | SER | -85.59   | 5.26     | 0.00              |
| A         | 299   | SER | A         | 303   | GLY | -107.88  | 4.97     | 0.00              |
| A         | 359   | ALA | A         | 362   | ARG | -72.08   | 3.27     | 0.00              |
| A         | 390   | PRO | A         | 394   | LEU | -88.29   | 3.30     | 0.00              |
| A         | 403   | GLY | A         | 412   | GLY | -58.91   | 4.63     | 0.00              |
| A         | 433   | VAL | A         | 445   | GLY | +108.26  | 3.06     | 0.00              |
| A         | 434   | GLY | A         | 443   | GLY | -112.56  | 5.70     | 0.00              |
| A         | 449   | THR | A         | 453   | VAL | +121.69  | 6.53     | 0.00              |
| A         | 450   | GLY | A         | 453   | VAL | +95.69   | 3.07     | 0.00              |
| A         | 452   | ALA | A         | 471   | THR | +126.03  | 6.49     | 0.00              |
| A         | 454   | VAL | A         | 469   | ILE | -77.84   | 5.68     | 0.00              |
| A         | 465   | GLY | A         | 490   | ASN | -92.10   | 5.80     | 0.00              |
| A         | 487   | GLY | A         | 574   | GLY | +101.85  | 2.25     | 0.00              |
| A         | 503   | GLY | A         | 567   | GLY | -104.99  | 3.62     | 0.00              |
| A         | 504   | PRO | A         | 564   | PRO | -86.59   | 3.65     | 0.00              |
| A         | 510   | PHE | A         | 598   | GLY | +70.38   | 4.72     | 0.00              |
| A         | 514   | SER | A         | 552   | ALA | +102.22  | 3.09     | 0.00              |
| A         | 517   | LYS | A         | 519   | GLN | +124.88  | 6.52     | 0.00              |
| A         | 524   | PRO | A         | 530   | THR | -115.53  | 6.74     | 0.00              |
| A         | 527   | GLY | A         | 809   | LYS | -63.42   | 5.27     | 0.00              |

(Continued to the next page)

Table S5. Continued

| Residue 1 |       |     | Residue 2 |       |     | Bond     |          |                   |
|-----------|-------|-----|-----------|-------|-----|----------|----------|-------------------|
| Chain     | Seq # | AA  | Chain     | Seq # | AA  | $\chi^3$ | kcal/mol | $\Sigma B$ factor |
| A         | 528   | ILE | A         | 809   | LYS | +113.56  | 0.94     | 0.00              |
| A         | 536   | LEU | A         | 541   | GLY | +125.80  | 5.87     | 0.00              |
| A         | 553   | ALA | A         | 597   | ALA | +121.51  | 3.59     | 0.00              |
| A         | 554   | ILE | A         | 779   | GLN | +123.20  | 5.82     | 0.00              |
| A         | 560   | GLY | A         | 599   | SER | +105.73  | 3.94     | 0.00              |
| A         | 561   | SER | A         | 565   | GLY | -63.55   | 4.42     | 0.00              |
| A         | 569   | GLY | A         | 647   | GLY | -69.89   | 2.81     | 0.00              |
| A         | 571   | ALA | A         | 639   | LYS | +102.52  | 5.73     | 0.00              |
| A         | 579   | GLY | A         | 632   | ARG | -89.31   | 7.78     | 0.00              |
| A         | 604   | PRO | A         | 613   | THR | +106.02  | 3.37     | 0.00              |
| A         | 605   | GLY | A         | 650   | PHE | -99.28   | 3.36     | 0.00              |
| A         | 607   | GLY | A         | 610   | ALA | +118.60  | 6.29     | 0.00              |
| A         | 611   | ALA | A         | 640   | GLN | +113.45  | 4.43     | 0.00              |
| A         | 638   | ASN | A         | 641   | LYS | -87.14   | 3.28     | 0.00              |
| A         | 656   | LYS | A         | 748   | GLY | -68.22   | 4.69     | 0.00              |
| A         | 659   | GLN | A         | 745   | GLY | +94.99   | 1.43     | 0.00              |
| A         | 674   | GLY | A         | 730   | HIS | -96.38   | 1.70     | 0.00              |
| A         | 677   | GLY | A         | 728   | GLY | -101.10  | 4.67     | 0.00              |
| A         | 678   | THR | A         | 681   | GLN | +124.60  | 8.09     | 0.00              |
| A         | 697   | LYS | A         | 711   | GLY | +93.88   | 0.51     | 0.00              |
| A         | 713   | ASP | A         | 730   | HIS | +84.66   | 6.55     | 0.00              |
| A         | 715   | LYS | A         | 728   | GLY | +114.31  | 3.73     | 0.00              |
| A         | 717   | GLN | A         | 727   | GLY | -94.08   | 3.92     | 0.00              |
| A         | 752   | GLY | A         | 852   | TRP | -72.84   | 2.01     | 0.00              |
| A         | 763   | ASP | A         | 815   | LYS | +96.72   | 1.97     | 0.00              |
| A         | 766   | GLY | A         | 844   | ALA | -80.67   | 2.15     | 0.00              |
| A         | 782   | GLY | A         | 788   | LEU | +120.81  | 6.71     | 0.00              |
| A         | 802   | ALA | A         | 805   | ALA | -86.57   | 5.80     | 0.00              |
| A         | 807   | THR | A         | 832   | GLN | -79.18   | 2.58     | 0.00              |
| A         | 812   | GLY | A         | 846   | LYS | +101.43  | 5.17     | 0.00              |
| A         | 829   | LEU | A         | 877   | LYS | +88.17   | 3.02     | 0.00              |
| A         | 856   | LEU | A         | 877   | LYS | +108.03  | 4.70     | 0.00              |
| A         | 863   | LYS | A         | 873   | GLY | +107.95  | 4.31     | 0.00              |
| A         | 883   | TYR | A         | 1002  | ALA | +98.48   | 3.64     | 0.00              |
| A         | 885   | GLY | A         | 1001  | ALA | +99.68   | 3.52     | 0.00              |
| A         | 885   | GLY | A         | 1002  | ALA | -96.00   | 7.44     | 0.00              |
| A         | 908   | ALA | A         | 986   | GLN | +99.03   | 3.90     | 0.00              |
| A         | 927   | SER | A         | 930   | SER | -91.67   | 2.21     | 0.00              |
| A         | 940   | SER | A         | 967   | ILE | -78.36   | 6.04     | 0.00              |
| A         | 945   | LEU | A         | 965   | ALA | +117.54  | 3.92     | 0.00              |
| A         | 947   | MET | A         | 955   | ALA | +95.60   | 7.56     | 0.00              |
| A         | 949   | GLY | A         | 959   | VAL | -66.27   | 5.95     | 0.00              |
| A         | 999   | ARG | A         | 1004  | THR | +106.88  | 2.84     | 0.00              |
| A         | 1000  | GLY | A         | 1007  | LYS | +75.82   | 3.29     | 0.00              |
| A         | 1001  | ALA | A         | 1007  | LYS | -80.34   | 5.34     | 0.00              |
| A         | 1002  | ALA | A         | 1006  | ALA | +100.50  | 1.73     | 0.00              |
| A         | 1003  | GLY | A         | 1006  | ALA | -64.17   | 4.32     | 0.00              |
| A         | 1028  | MET | A         | 1057  | SER | +99.64   | 0.70     | 0.00              |
| A         | 1033  | ALA | A         | 1056  | LEU | +104.32  | 4.28     | 0.00              |
| A         | 1045  | TYR | A         | 1048  | ALA | +125.46  | 6.12     | 0.00              |
